# Supplementary material
Source: publisher figshare collection journal article supplement (https://springernature.figshare.com/ndownloader/files/10595839)
Supplement: Supplementary file [file 10595839]

## **Additional file 1: Supplementary Figures and Tables**

### **Supplementary Figures:**

**Figure S1;** Fetuses recovered from the *i*-GONAD procedure to edit the *Tyr*-gene.

**Figure S2;** Germline transmission of *Tyr*-gene-corrected allele.

**Figure S3;** Generation of reporter knock-in mice at the *Tis21* locus using the GONAD method.

**Figure S4;** Generation of *indel* mutation in the *Tyr* locus of various mouse strains using *i*-GONAD.

**Figure S5;** Generation of *indel* mutation in the *Kit* locus of C3H/HeSlc and C57BL/6NCrSlc mouse strains using *i*-GONAD.

**Figure S6;** Knock-in of ssODN into *Cdkn1a* and *Cdkn2a* loci in the C57BL/6NCrI mouse strain using *i*-GONAD.

**Figure S7;** Restoration of *Tyr* mutation of albino Jcl:MCH(ICR) mice by ssODN-based knock-in using *i*-GONAD with AsCpf1.

**Figure S8;** *i*-GONAD-used females retain reproductive capability.

### **Supplementary Tables:**

**Table S1;** Generation of *Foxe3* knock-out mice using conventional GONAD and *i*-GONAD approaches.

**Table S2;** Correction of *Tyr* mutation by ssODN knock-in using the *i*-GONAD method.

**Table S3;** Correction of *Tyr* mutation by zygote microinjection of CRISPR/Cas9 components.

**Table S4;** Restoration of *agouti* gene expression by elimination of retrotransposon sequence using the *i*-GONAD method.

**Table S5;** Generation of reporter gene knock-in mice using *i*-GONAD with ssDNA as donors.

**Table S6;** Editing of the *Hprt* locus using *i*-GONAD with AsCpf1.

**Table S7;** Correction of *Tyr* mutation using the *i*-GONAD with AsCpf1.

**Table S8;** CRISPR target sequences and the types of gRNA used.

**Table S9;** Sequences of the oligonucleotides used in this study.

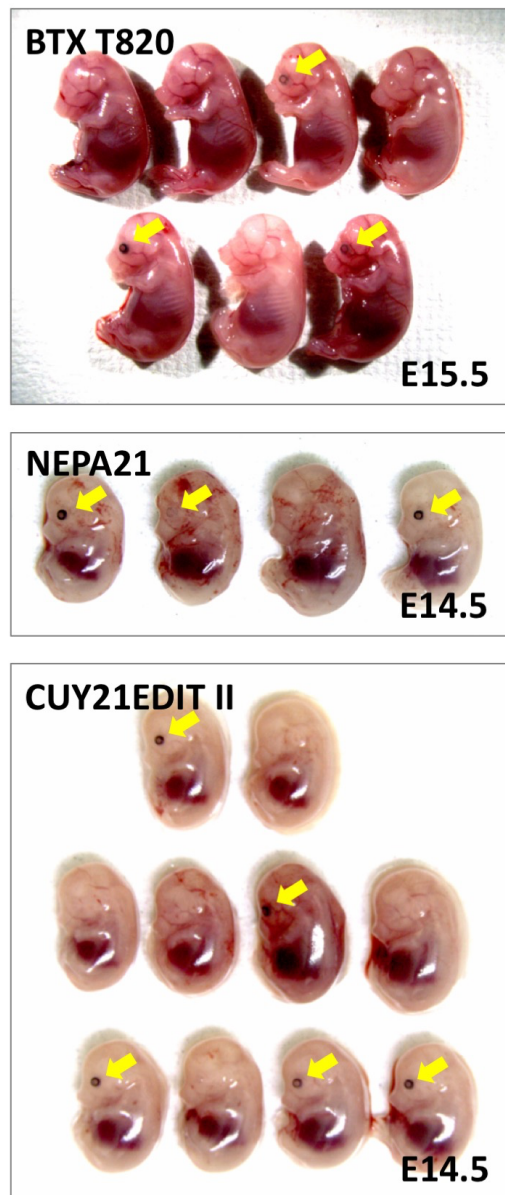

**Figure S1.** Fetuses recovered from the *i*-GONAD procedure to edit the *Tyr*-gene. Data shows that *i*-GONAD can produce comparable levels of genome editing using electroporators from three different manufacturers. The pigmented eyes of the fetuses are indicated by yellow arrows.

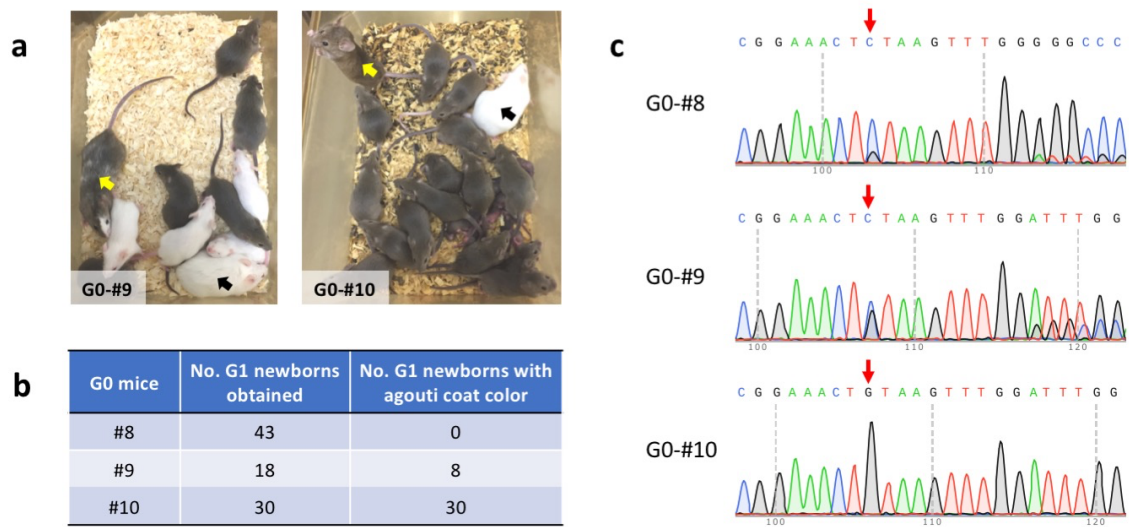

**Figure S2** Germline transmission of *Tyr*-gene-corrected allele. The G0 mice (G0-#8, -#9, and -#10 obtained from female #5 mouse in **Table S2**; see also **Fig. 3c**) were mated with Jcl:MCH(ICR) mice and germline transmission of repaired allele was checked by coat color observation. **a** The G0-#9 and -#10 mice (shown in yellow arrows) were mated with Jcl:MCH(ICR) mice (shown in black arrows) to obtain G1 offspring. **b** Germline transmission rate. **c** Direct sequencing results of PCR products amplified from each of the G0 mouse. Red arrows indicate the position of the mutated/corrected nucleotides.

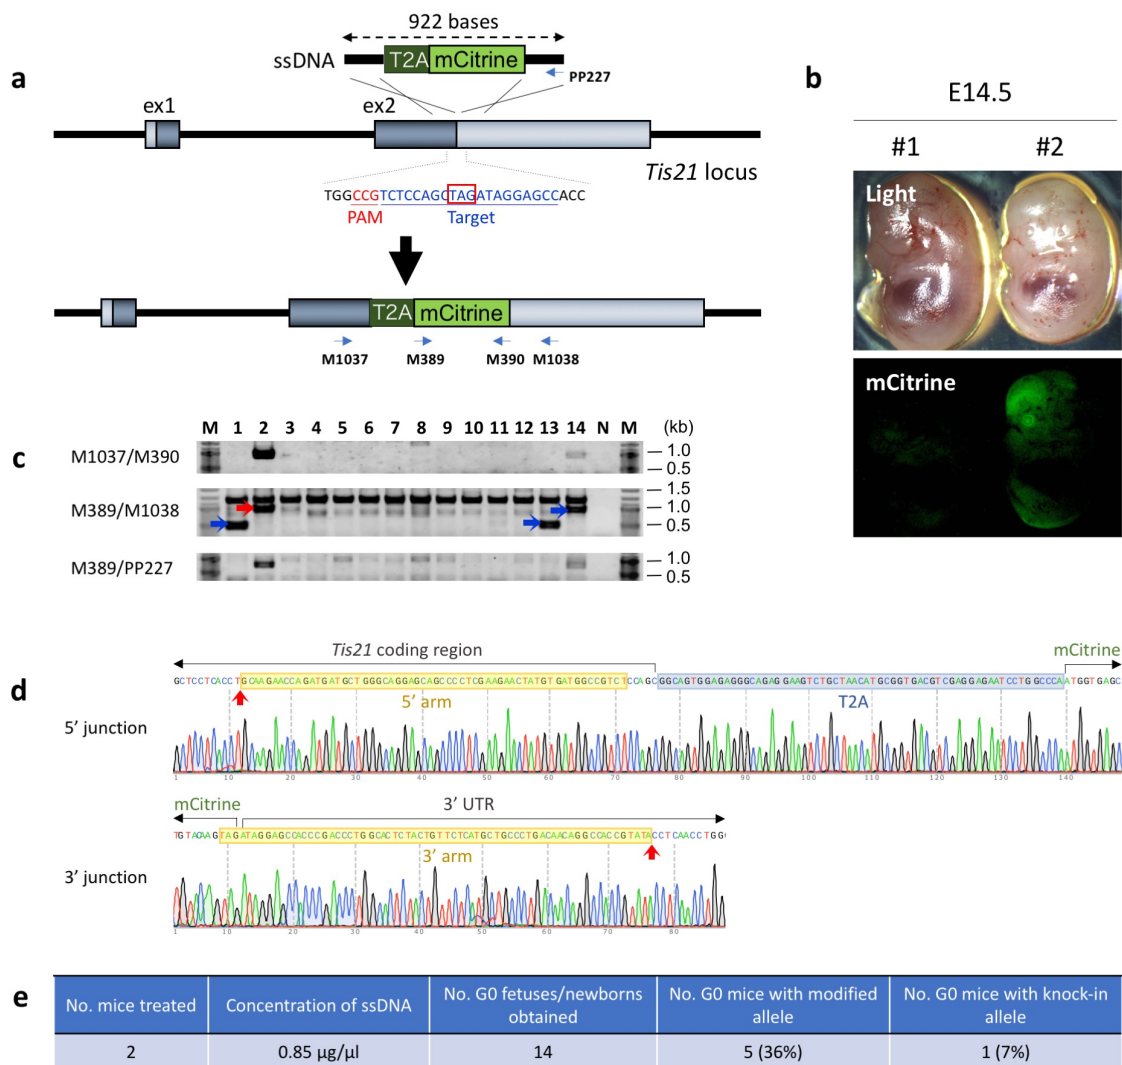

**Figure S3** Generation of reporter knock-in mice at the *Tis21* locus using the *i*-GONAD method. **a** Schematic diagram illustrating the insertion of “T2A-mCitrine” cassette into the *Tis21* locus. The target sequence and the primer sets used for genotyping are shown. A 922 bases-long ssDNA synthesized by *iv*TRT method was used as the donor DNA. **b** mCitrine fluorescence in the G0-#2 fetus collected at Day 14.5 (right) whereas no fluorescence was detected in the fetus G0-#1 (left). **c** Genotyping analysis for the knock-in allele in G0 fetuses. Expected fragment sizes: M1037/M390 = 964-bp, M389/M1038 = 1005-bp, M389/PP227 = 802-bp. N: negative control, M: size marker. The PCR band shown with a red arrow indicates the correct insertion of the cassette and the bands shown in blue arrows indicate partial insertion. **d** sequencing chromatogram showing 5' and 3' junctional regions of the inserted cassette. The junctional sequences showing insertion in the G0-#2 fetus in **b** is shown. Red arrows indicate junctions between the arms and the genomic sequences. **e** Genome editing efficiency of the *Tis21* locus using the *i*-GONAD method.

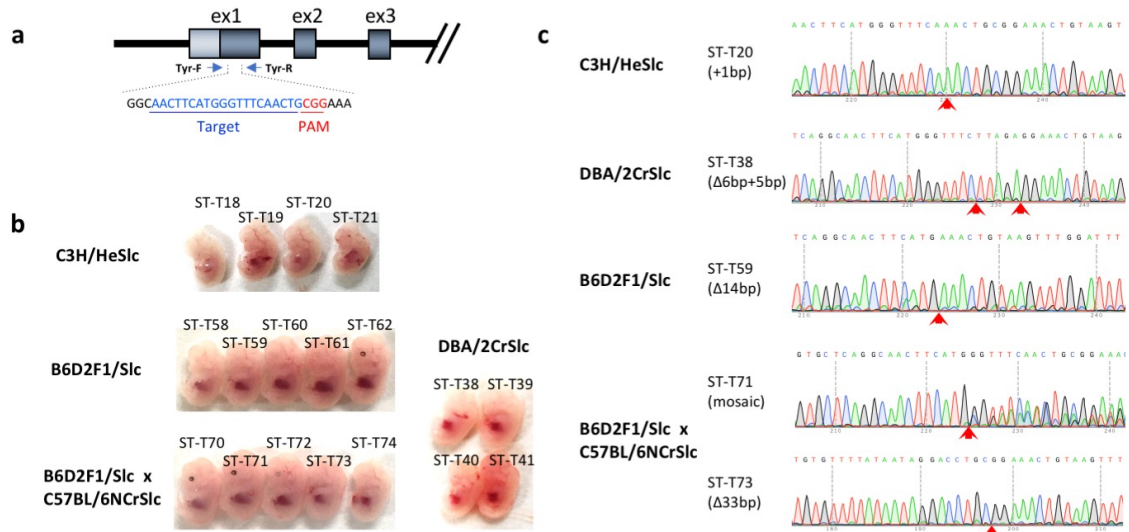

**Figure S4** Generation of *indel* mutation in the *Tyr* locus of various mouse strains using *i*-GONAD. **a** Schematic of the *Tyr* gene targeting strategy and the primer set used for genotyping. **b** Representative fetuses showing *Tyr* knockout phenotype (loss of eye pigmentation). **c** Direct sequencing results of PCR products amplified from each of the G0 fetuses. Red arrows indicate the position of the mutated nucleotides.

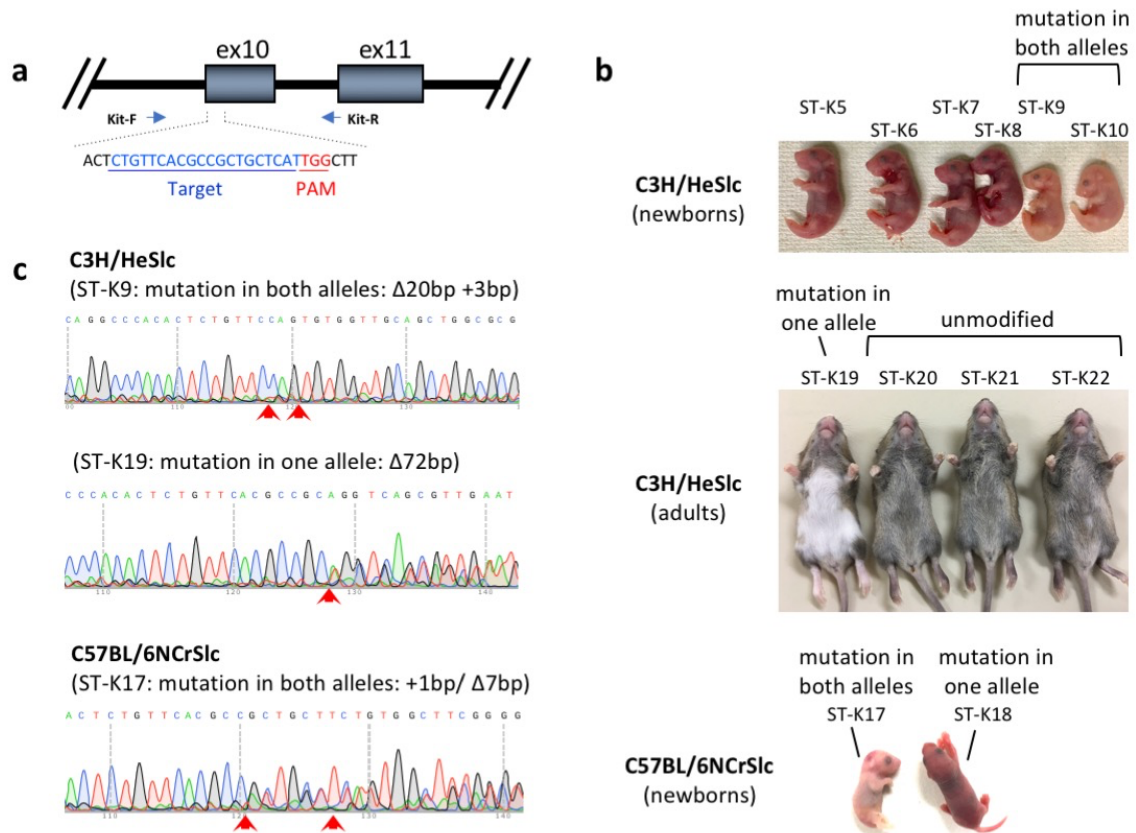

**Figure S5** Generation of *indel* mutation in the *Kit* locus of C3H/HeSlc and C57BL/6NCrSlc mouse strains using *i*-GONAD. **a** Schematic of the *Kit* gene targeting strategy and the primer set used for genotyping. **b** Representative fetuses showing *Kit* knockout phenotype (body color phenotype). **c** Direct sequencing results of PCR products amplified from each of the G0 fetuses. Red arrows indicate the position of the mutated nucleotides.

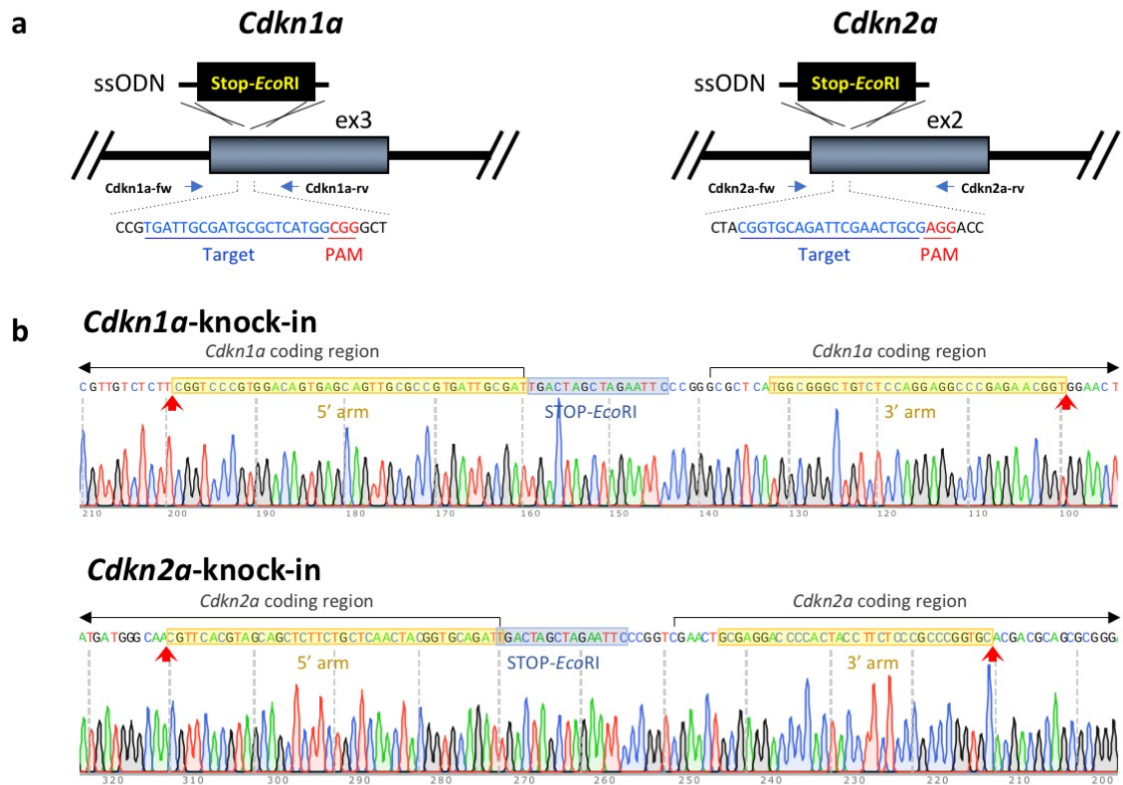

**Figure S6** Knock-in of ssODN into *Cdkn1a* and *Cdkn2a* loci in the C57BL/6NCrl mouse strain using *i*-GONAD. **a** Schematic of the targeting strategy to inactivate *Cdkn1a* or *Cdkn2a* gene and the primer sets used for genotyping. **b** Sequencing results of cloned PCR products amplified from each of the G0 fetuses. Red arrows indicate junctions between the arms and the genomic sequences.



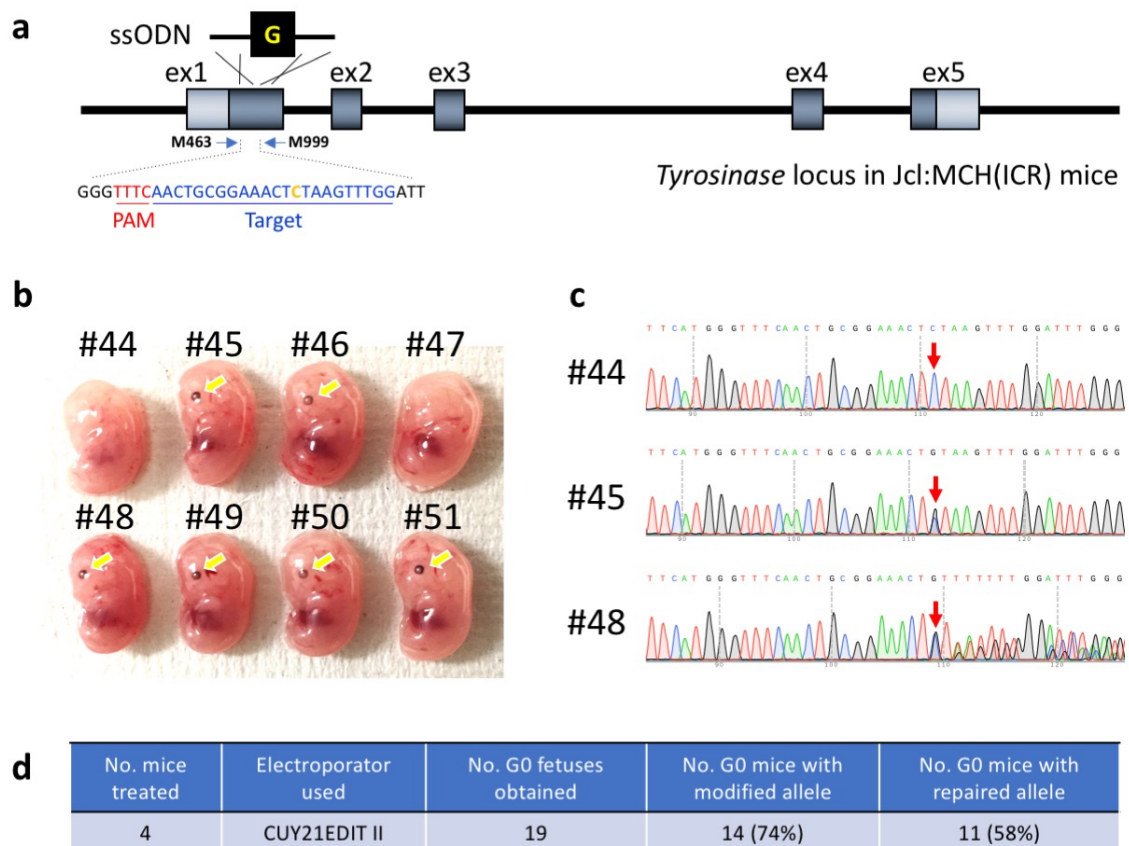

**Figure S7** Restoration of *Tyr* mutation of albino Jcl:MCH(ICR) mice by ssODN-based knock-in using *i*-GONAD with AsCpf1. **a** Schematic to show rescue of *Tyr* gene mutation. The target region containing the guide sequence for AsCpf1 and the genotyping primer binding sites are shown. **b** Representative E14.5 litter showing *Tyr* rescued G0 fetuses. The pigmented eyes of the fetuses are indicated by yellow arrows. **c** Direct sequencing results of PCR products amplified from the G0 fetuses (in **b**). The position for mutated/corrected nucleotides are indicated by red arrows. **d** Efficiencies of *Tyr* gene editing.



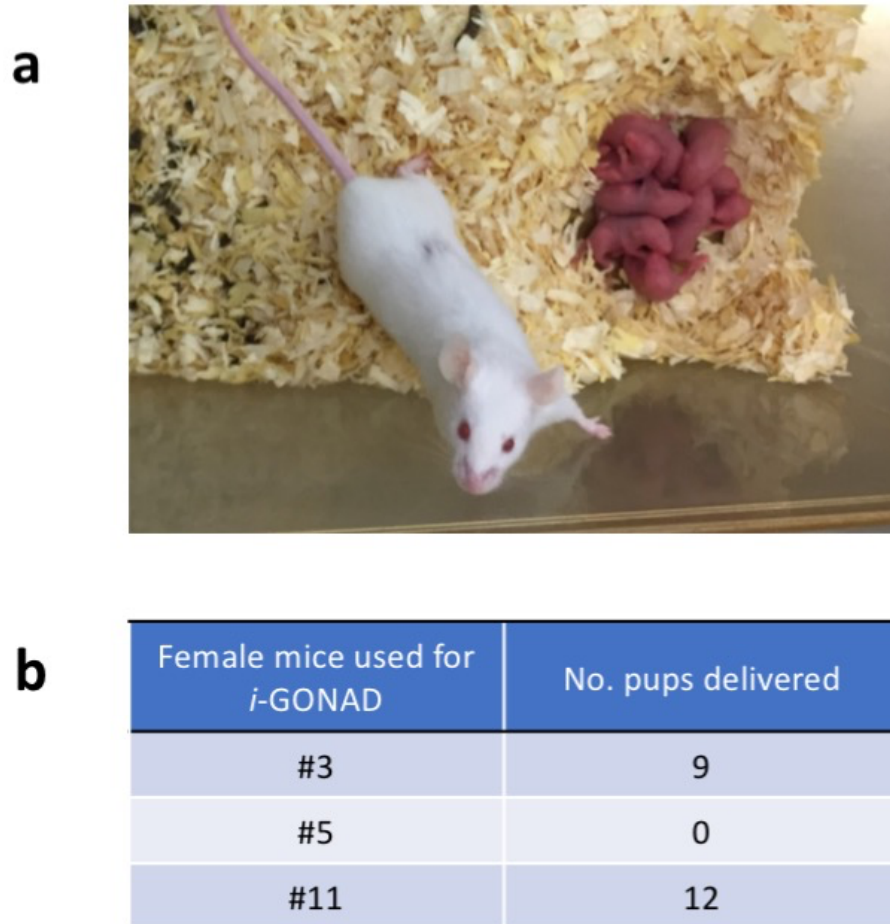

**Figure S8** *i*-GONAD-used females retain reproductive capability. *i*-GONAD-used female mice (#3, #5, and #11 in **Table S2**) were mated with Jcl:MCH(ICR) males in their next cycle. **a** Representative *i*-GONAD-used female mouse #3 with her litter of 9 pups. **b** Litter size of all three *i*-GONAD-used females.

**Table S1.** Generation of *Foxe3* knock-out mice using conventional GONAD and *i*-GONAD approaches.

| Mice  | Concentration of CRISPR/Cas9 components                                                                  | Electroporator used | No. of G0 fetuses/pups obtained | No. of G0 fetuses/pups with mutation | No. of mosaic fetuses/pups |
|-------|----------------------------------------------------------------------------------------------------------|---------------------|---------------------------------|--------------------------------------|----------------------------|
| #1    | <b>conventional GONAD</b><br><br>Cas9 mRNA (1.5µg/µl)<br><br>Foxe3_3_Cr_sgRNA (0.8µg/µl)                 | BTX T820            | 7                               | 4                                    | 4                          |
| #2    |                                                                                                          |                     |                                 |                                      |                            |
| #3    |                                                                                                          |                     | 13                              | 3                                    | 3                          |
| #4    |                                                                                                          |                     |                                 |                                      |                            |
| #5    |                                                                                                          |                     | 11                              | 3                                    | 2                          |
| #6    |                                                                                                          |                     |                                 |                                      |                            |
| #7    |                                                                                                          |                     | 5                               | 1                                    | 0                          |
| #8    |                                                                                                          |                     |                                 |                                      |                            |
| total |                                                                                                          |                     | 36                              | 11 (31%)                             | 9 (82%)                    |
| #9    | <b><i>i</i>-GONAD</b><br><br>Cas9 protein (1mg/ml)<br><br>crRNA-Foxe3-3-Cr (30µM)<br><br>tracrRNA (30µM) | BTX T820            | 2                               | 2                                    | 1                          |
| #10   |                                                                                                          |                     | 2                               | 2                                    | 1                          |
| #11   |                                                                                                          |                     | 9                               | 9                                    | 7                          |
| #12   |                                                                                                          | CUY21EDIT II        | 6                               | 5                                    | 2                          |
| #13   |                                                                                                          |                     | 5                               | 5                                    | 4                          |
| #14   |                                                                                                          |                     | 3                               | 3                                    | 0                          |
| #15   |                                                                                                          |                     | 9                               | 9                                    | 5                          |
| total |                                                                                                          |                     | 36                              | 35 (97%)                             | 20 (57%)                   |

**Table S2.** Correction of *Tyr* mutation by ssODN knock-in using the *i*-GONAD method.

| Female mice                  | Concentration of CRISPR/Cas9 components                                                | Electroporator used | No. of G0 fetuses/pups obtained | No. of G0 fetuses/pups with modified allele | No. of G0 fetuses/pups with repaired allele | No. of G0 fetuses/pups with <i>indel</i> mutation | No. of mosaic fetuses/pups |
|------------------------------|----------------------------------------------------------------------------------------|---------------------|---------------------------------|---------------------------------------------|---------------------------------------------|---------------------------------------------------|----------------------------|
| #1                           | Cas9 protein (1mg/ml)<br>crRNA-ICR-tyr (30μM)<br>tracrRNA (30μM)<br>ssODN-tyr (2μg/μl) | BTX T820            | 4                               | 4                                           | 1                                           | 4                                                 | 0                          |
| #2                           |                                                                                        |                     | 7                               | 7                                           | 3                                           | 7                                                 | 5                          |
| #3                           |                                                                                        |                     | 4                               | 4                                           | 1                                           | 4                                                 | 2                          |
| #4                           |                                                                                        |                     | 4                               | 3                                           | 3                                           | 3                                                 | 2                          |
| #5                           |                                                                                        |                     | 13                              | 11                                          | 7                                           | 10                                                | 9                          |
| total                        |                                                                                        |                     | 32                              | 29 (91%)                                    | 15 (47%)                                    | 28 (88%)                                          | 18 (62%)                   |
| #6                           |                                                                                        | NEPA21              | 7                               | 7                                           | 4                                           | 6                                                 | 3                          |
| #7                           |                                                                                        |                     | 10                              | 7                                           | 3                                           | 7                                                 | 5                          |
| #8                           |                                                                                        |                     | 4                               | 4                                           | 4                                           | 2                                                 | 2                          |
| #9                           |                                                                                        |                     | 4                               | 4                                           | 2                                           | 4                                                 | 2                          |
| #10                          |                                                                                        |                     | 0                               | 0                                           | 0                                           | 0                                                 | 0                          |
| #11                          |                                                                                        |                     | 7                               | 5                                           | 3                                           | 5                                                 | 3                          |
| total                        |                                                                                        |                     | 32                              | 27 (84%)                                    | 16 (50%)                                    | 24 (75%)                                          | 15 (56%)                   |
| #12                          |                                                                                        | CUY21EDIT II        | 6                               | 6                                           | 2                                           | 6                                                 | 5                          |
| #13                          |                                                                                        |                     | 4                               | 4                                           | 3                                           | 2                                                 | 2                          |
| total                        |                                                                                        |                     | 10                              | 10 (100%)                                   | 5 (50%)                                     | 8 (80%)                                           | 7 (70%)                    |
| total of all the experiments |                                                                                        |                     | 74                              | 66 (89%)                                    | 36 (49%)                                    | 60 (81%)                                          | 40 (61%)                   |

**Table S3.** Correction of *Tyr* mutation by zygote microinjection of CRISPR/Cas9 components.

| Exp.  | Eggs injected | Embryos transferred | No. of G0 fetuses obtained | No. of G0 fetuses with modified allele | No. of G0 fetuses with repaired allele | No. of G0 fetuses with <i>indel</i> mutation | No. of mosaic fetuses |
|-------|---------------|---------------------|----------------------------|----------------------------------------|----------------------------------------|----------------------------------------------|-----------------------|
| 1     | 64            | 50                  | 3                          | 1                                      | 1                                      | 0                                            | 0                     |
| 2     | 116           | 93                  | 32                         | 24                                     | 17                                     | 16                                           | 8                     |
| 3     | 159           | 99                  | 27                         | 24                                     | 14                                     | 19                                           | 13                    |
| total | 339           | 242                 | 62                         | 49 (79%)                               | 32 (52%)                               | 35 (56%)                                     | 21 (43%)              |

**Table S4.** Restoration of *agouti* gene expression by elimination of retrotransposon sequence using the *i*-GONAD method.

| Female mice | Concentration of CRISPR/Cas9 components                                                                      | Electroporator used | No. of G0 mice obtained | No. of G0 mice with modified allele | No. of G0 mice with repaired allele | Knock-in of ssODN |
|-------------|--------------------------------------------------------------------------------------------------------------|---------------------|-------------------------|-------------------------------------|-------------------------------------|-------------------|
| #3          | Cas9 protein (1mg/ml)<br>Agouti-crRNA-1 (15μM)<br>Agouti-crRNA-2 (15μM)<br>tracrRNA (30μM)<br>ssODN (2μg/μl) | BTX T820            | 2                       | 0                                   | 0                                   | 0                 |
| #4          |                                                                                                              |                     | 0                       | 0                                   | 0                                   | 0                 |
| #7          |                                                                                                              |                     | 0                       | 0                                   | 0                                   | 0                 |
| #8          |                                                                                                              |                     | 0                       | 0                                   | 0                                   | 0                 |
| #1          |                                                                                                              | NEPA21              | 1                       | 1                                   | 1                                   | 1                 |
| #2          |                                                                                                              |                     | 0                       | 0                                   | 0                                   | 0                 |
| #5          |                                                                                                              |                     | 1                       | 1                                   | 1                                   | 0                 |
| #6          |                                                                                                              |                     | 2                       | 2                                   | 1                                   | 0                 |
| total       |                                                                                                              |                     | 6                       | 4 (67%)                             | 3 (50%)                             | 1 (17%)           |

**Table S5.** Generation of reporter gene knock-in mice using *i*-GONAD with ssDNA as donors.

| Female mice | Locus        | Concentration of ssDNA | No. of G0 fetuses obtained | No. of G0 fetuses with modified allele* | No. of G0 knock-in fetuses |
|-------------|--------------|------------------------|----------------------------|-----------------------------------------|----------------------------|
| #1          | <i>Pitx3</i> | 1.3µg/µl               | 8                          | 5                                       | 1                          |
| #2          |              |                        | 13                         | 6                                       | 1                          |
| #3          |              | 1.4µg/µl               | 13                         | 10                                      | 3                          |
| total       |              |                        | 34                         | 21 (62%)                                | 5 (15%)                    |
| #4          | <i>Tis21</i> | 0.85µg/µl              | 11                         | 2                                       | 1                          |
| #5          |              |                        | 3                          | 3                                       | 0                          |
| total       |              |                        | 14                         | 5 (36%)                                 | 1 (7%)                     |

\* including those containing *indel* mutation, complete knock-in cassette, and partial knock-in.



**Table S6.** Editing of the *Hprt* locus using *i*-GONAD with AsCpf1.

| Female mice | Concentration of Cpf1/crRNA components [Electroporator used] | No. of G0 fetuses obtained | No. of G0 fetuses with mutation | No. of mosaic fetuses |
|-------------|--------------------------------------------------------------|----------------------------|---------------------------------|-----------------------|
| #1          | Cpf1 protein (6.3μM)<br>Cpf1 crRNA (30μM)<br>[NEPA21]        | 2                          | 2                               | 2                     |
| #2          |                                                              | 9                          | 9                               | 6                     |
| #3          |                                                              | 6                          | 4                               | 1                     |
| #4          |                                                              | 16                         | 7                               | 5                     |
| #5          |                                                              | 7                          | 4                               | 3                     |
| total       |                                                              | 40                         | 26 (65%)                        | 17 (65%)              |

**Table S7.** Correction of *Tyr* mutation using the *i*-GONAD with AsCpf1.

| Female mice | Concentration of AsCpf1/crRNA components [Electroporator used] | No. of G0 fetuses obtained | No. of fetuses with modified allele | No. of fetuses with repaired allele | No. of fetuses with <i>indel</i> mutation | No. of mosaic fetuses |
|-------------|----------------------------------------------------------------|----------------------------|-------------------------------------|-------------------------------------|-------------------------------------------|-----------------------|
| #1          | AsCpf1 protein (6.3 $\mu$ M)                                   | 6                          | 6                                   | 3                                   | 4                                         | 3                     |
| #2          | AsCpf1 crRNA-ICR-tyr (30 $\mu$ M)                              | 5                          | 2                                   | 2                                   | 0                                         | 0                     |
| #3          | ssODN-tyr (2 $\mu$ g/ $\mu$ l)                                 | 8                          | 6                                   | 6                                   | 3                                         | 2                     |
| #4          | [CUY21EDIT II]                                                 | 0                          | 0                                   | 0                                   | 0                                         | 0                     |
| total       |                                                                | 19                         | 14 (74%)                            | 11 (58%)                            | 7 (37%)                                   | 5 (36%)               |

**Table S8.** CRSIPR target sequences and the types of gRNA used.

| Target loci             | Target seqs (5'-3')  | PAM | Types of gRNA used      |
|-------------------------|----------------------|-----|-------------------------|
| <i>Foxe3</i>            | GAGACAGCCGGGCTTCGCGC | CGG | crRNA/tracrRNA or sgRNA |
| <i>Tyr</i> (ICR)        | GGAAACTCTAAGTTTGGATT | TGG | crRNA/tracrRNA          |
| <i>Agouti</i> (1)       | AATGGACATTTAGTCGAACT | GGG | crRNA/tracrRNA          |
| <i>Agouti</i> (2)       | AGGGTTTAACCACCTATCGA | AGG | crRNA/tracrRNA          |
| <i>Pitx3</i>            | CGGTGTGAGCCGCAGGTCTG | TGG | crRNA/tracrRNA          |
| <i>Tis21</i>            | GGCTCCTATCTAGCTGGAGA | CGG | crRNA/tracrRNA          |
| <i>Tyr</i> (wild)       | AACTTCATGGGTTTCAACTG | CGG | crRNA/tracrRNA          |
| <i>Kit</i>              | CTGTTCACGCCGCTGCTCAT | TGG | crRNA/tracrRNA          |
| <i>p21 (Cdkn1a)</i>     | TGATTGCGATGCGCTCATGG | CGG | crRNA/tracrRNA          |
| <i>p16/p19 (Cdkn2a)</i> | CGGTGCAGATTCGAACTGCG | AGG | crRNA/tracrRNA          |

**Table S9.** Sequences of the oligonucleotides used in this study.

| Name of oligos        | Sequences (5'-3')                                                                                                                                 |
|-----------------------|---------------------------------------------------------------------------------------------------------------------------------------------------|
| <i>Tyr-rescue*</i>    | <u>TGTTTTATAATAGGACCTGCCAGTGTCTAGGCAACTTCATGGGTTTCAACTGCGGAAACTGTAAGTTTGATTGGGGGCCCA</u><br><u>AATTGTACAGAGAAGCGAGTCTTGATTAGAAGAAACATTTTGATTG</u> |
| <i>agouti-rescue*</i> | <u>TTTATTGCAACCTGCCTTTGCCTTTATATGTGTTGAATATTTTAGACTTGATACCCAGTGAATTCGAAGGGTTTCCCAAACCC</u><br><u>TCCTCAGAACTCAGGAGTATCATTAAAGGTACTGCGGTTT</u>     |
| M1035                 | TCCTCCCCCTATGTATACCG                                                                                                                              |
| M1036                 | TCCCTGTTCTGGCCTTAG                                                                                                                                |
| M1037                 | CCTGTGGGTTGATCCCTATG                                                                                                                              |
| M1038                 | CAAACACTGGCTCACAGATG                                                                                                                              |
| M1051                 | GTAATACGACTCACTATAGGGCCCGGCCGCCGCCGCTAACCTTAGCCCCTGCCAGTACGCCGTGGAACGGCCGGTGG<br>GCAGTGGAGAGGGCAGAG                                               |
| M1052                 | CATGAATCAAGCCAGTCTAGGCGACCCCTGTCCGGAGAGGCTGTGAATTACTGCCCCGCCCTCGGGGATGGATCCACAGAC<br>CTGCGGCTCACTTGACAGCTCGTCCATGCC                               |
| M1053                 | GTAATACGACTCACTATAGGGCAAGAACCAGATGATGCTGGGCAGGAGCAGCCCCTCGAAGAACTATGTGATGGCCGTCTCCA<br>GCGGCAGTGGAGAGGGCAGAG                                      |
| M1054                 | CATGAATCTATACGGTGGCCTGTTGTACAGGCGAGCATGAGAACAGTAGAGTGCCAGGGTGGGTGGCTCCTATCTACTTGTA<br>CAGCTCGTCCATGCC                                             |
| M1055                 | TAATACGACTCACTATAGGGAGACAGCCGGGCTTCGCGCGTTTTAGAGCTAGAAATAGCAAG                                                                                    |
| M272                  | CAGGAAACAGCTATGACC                                                                                                                                |
| M389                  | TCGCCACCATGGTGAGCAAGGGCGAG                                                                                                                        |
| M390                  | CTCTAGACTTTACTTGTACAGCTCGTCCAT                                                                                                                    |
| M463                  | TCCTTCTGTCCAGTGCACCAT                                                                                                                             |
| M939                  | AAAAAAGCACCGACTCGG                                                                                                                                |
| M943                  | AGGATCTGTGTCAACCCATT                                                                                                                              |
| M944                  | ACAAAGAAAACCAAGCGTGAC                                                                                                                             |
| M947                  | CTTGAGAAAGGCCACAGTTTC                                                                                                                             |
| M948                  | ACGAACCTCTTCATCTGCTGT                                                                                                                             |
| M992                  | CCTGGACAGCCTGTTGGG                                                                                                                                |
| M993                  | TTCAGTCTGGTGGTGAGACAG                                                                                                                             |
| M999                  | ATGGGTGTTGACCCATTGTT                                                                                                                              |
| PP226                 | CAAGCCAGTCTAGGCGACCC                                                                                                                              |
| PP227                 | CATGAATCTATACGGTGGCC                                                                                                                              |
| Mm HPRT F15           | AGGTTTCGAGCCCTGATATTCG                                                                                                                            |
| Mm HPRT R15           | ATGTGGCAAGGTCAAAAACAGT                                                                                                                            |
| Tyr-F                 | TCTCTGATGGCCATTTTCCTC                                                                                                                             |
| Tyr-R                 | AACATGGGTGTTGACCCATT                                                                                                                              |
| Kit-F                 | GAGGGAAATGGTTTAGTTTGGG                                                                                                                            |
| Kit-R                 | GGGTTTCTGGAGGAGAAAGG                                                                                                                              |
| Cdkn1a-fw             | CCTGAAGACTGTGATGGGGTA                                                                                                                             |
| Cdkn1a-rv             | TCTCCGTGACGAAGTCAAAGT                                                                                                                             |
| Cdkn2a-fw             | GCCGTGATCCCTCTACTTTT                                                                                                                              |
| Cdkn2a-rv             | TATCGCACGATGTCTTGATGT                                                                                                                             |
| Sry-F2                | AAGCGACCCATGAATGCATTCATGGTGTGGT                                                                                                                   |
| Sry-R2                | GAGGTCGATACTTATAGTTCGGGTATTCTCTCTGTG                                                                                                              |

\* Regions of homology are underlined.
